# Supplementary material for: Tislelizumab plus lenvatinib as the first-line therapy in patients with advanced fumarate hydratase-deficient renal cell carcinoma: a single-arm, single-centre, phase 2 trial and metabolic biomarker analysis
Source: Research Square preprint supplement (doi:10.21203/rs.3.rs-8771803/v1), 2026-02-13
Supplement: Supplementary file 1 [file 0cfd7ce1e326766f5bb76904.xlsx]

## Sheet: Baseline clinical inforamtion
No.	Name	Gender	Age	ECOG	History of nephrectomy	Stage at prior surgery	T stage at enrollment	N stage at enrollment	M stage at enrollment	Sites of recurrence or metastasis	Number of disease sites	IMDC	IHC	FH Germline alteration	Somatic alteration	Enrollment date: C1D1	interval from nephrectomy until enrollment (month)	Last follow-up (Until 2025.12.22)	Follow-up (months)
P01	CLQ	M	30	2	None	NA	4	1	1	Left renal tumor, left adrenal gland, bilateral lungs, pleura, local and remote multiple lymph nodes, bone	6	Poor	FH（-），2SC（+）	None	NA	2023.9.5	NA	2024.8.17	11.6	died
P02	HYZ	M	27	0	2023.8.3	Left: T2aN1M0，Right: T3aN1M0	3a	1	0	Right renal tumor, retroperitoneal lymph nodes	2	Intermediate	FH（-），2SC（+）	FH：c.1027C>T	NA	2023.9.17	1.5	2025.12.22	27.6
P03	CQI	M	50	0	2023.9.13	T3aN1M1	x	1	1	Retroperitoneal lymph nodes, spine and pelvis bone	2	Poor	FH（-），2SC（+）	None	FH：c.437G>A	2023.11.7	1.8	2025.11.17	24.7
P04	CYH	M	30	2	2022.9.30	T3cN1M0	x	1	1	Renal fossa, right adrenal gland, multiple peritoneal and retroperitoneal lymph nodes, liver, spine and pelvis bone	5	Poor	FH（-），2SC（+）	FH：c.1027C>T；MUTYH：c.55C>T	PRDM1：c.1756C>A	2023.11.24	14	2025.11.10	23.9
P05	YZH	M	26	0	2023.1.28	T1bN0M0	x	0	1	Renal fossa	1	Intermediate	FH（-），2SC（+）	FH：c.1024_1025del AT	NA	2023.12.15	10.7	2025.12.29	24.8
P06	LFY	F	31	0	2023.10.31	T3aN0M1	x	0	1	Bilateral lungs, mediastinal and hilar lymph nodes, retroperitoneal nodes	3	Poor	FH（-），2SC（+）	FH：c.525_528dup	NF2：c.573G>A	2024.1.10	2.4	2025.12.22	23.7
P07	CMW	M	24	1	None	NA	4	1	1	Left renal tumor, retroperitoneal lymph nodes, T12 bone	3	Intermediate	FH（-），2SC（+）	FH：c.1521_1522insACTG；MSH6：c.2173A>G；MRE11：c.1834G>A	None	2024.1.24	NA	2025.9.22	20.2
P08	LZG	M	51	0	2023.12.21	T1aN0M0	3a	0	0	Left residual renal mass	1	Intermediate	FH（+），2SC（3+）	FH：c.1109-2A>C	FH：c.697C>T；HGF c.700C>T；PIK3R1：c.1699A>G	2024.2.6	1.5	2025.10.13	20.5
P09	CSL	M	49	0	2023.5.11	T3aN0M0	x	0	1	Renal fossa and retroperitoneal recurrence	1	Intermediate	FH（-），2SC（+）	FH：exon1-10 deletion	FH：loss；PIK3C：p.E542K；NF2：p.L64Cfs*59；KEAP1：c.958C>T；DNMT3A：c.2662C>A；TET2：c.951_952delinsTT	2024.2.6	9	2025.12.22	22.8
P10	YYL	M	56	0	2023.5.2	T3aN1M0	x	0	1	Renal fossa and retroperitoneal spread	1	Intermediate	FH（-），2SC（+）	None	FH：c.623T>A；NKX： c.877C>G	2024.2.6	9.3	2025.10.28	21
P11	ZJY	M	56	0	2023.2.15	T1aN0M0	3a	1	1	Left residual renal mass, left adrenal gland, multiple retroperitoneal lymph nodes, T3 bone and left 11th rib	4	Favorable	FH（-），2SC（+）	None	FH：copy number loss	2024.4.24	14.5	2025.10.13	17.9
P12	HSL	M	37	2	None	NA	1a	0	1	Left renal tumor, bone and bone marrow	2	Poor	FH（+），2SC（+）	FH：c.1189G>A	NA	2024.4.24	NA	2025.4.28	12.3	lost of followup
P13	XJI	M	34	0	2023.4.28	T3aN0M0	x	1	0	Multiple retroperitoneal lymph nodes	1	Favorable	FH（-），2SC（+）	FH：c.203A>C; NBN：c.293>T	NF2: c.1030C>T; NF2: c.982G>T	2024.5.2	12.3	2025.10.13	17.6
P14	LYA	M	40	2	2023.4.24	T2bN0M0	x	1	1	Retroperitoneal mass, left adrenal gland, bone, multiple retroperitoneal lymph nodes	4	Intermediate	FH（-），2SC（3+）	None	FH：c.1391-2A>T; FH：c.196A>T; MLH3, PIGA; TOP1; SETD1B;FANCA	2024.7.10	14.8	2025.3.14	8.2	died
P15	XLQ	F	61	0	2023.10.31	T1bN0M0	x	0	1	Renal fossa	1	Intermediate	FH（+/-)，2SC（+）	FH：c.839G>T	SOS1, PTPN11	2024.7.23	8.9	2025.10.13	14.9
P16	LJC	M	27	1	None	NA	3b	1	1	Right renal tumor, IVC tumour thrombus, retroperitoneal and mediastinal lymph nodes, bilaterla lungs, L1 bone	5	Poor	FH（-），2SC（+）	FH：c.162T>G	LOH	2024.9.10	NA	2025.11.10	14.2
P17	ZZC	F	43	1	2023.6.15	T3aN0M0	x	1	1	Renal fossa and peritoneal masses, left adrenal gland, liver, retroperitoneal lymph nodes, abdominal wall muscle, spine and pelvis bone	6	Intermediate	FH（-），2SC（+）	FH：c.1240A >G	NA	2024.10.9	16.1	2025.12.22	14.6
P18	CFA	F	46	0	2023.9.6	T3aN0M0	x	1	1	Liver, retroperitoneal lymph nodes	2	Intermediate	FH（-），2SC（+）	FH：1q43 fragement deletion	NA	2024.10.22	13.7	2025.10.13	11.9
P19	YXL	M	62	1	2023.5.24	T2bN0M0	x	1	1	Renal fossa and retroperitoneal masses, left adrenal gland, bilateral pulmonary hilar metastasis, left supraclavicular lymph nodes, T12 and acetabular bone	5	Favorable	FH（-），2SC（+）	FH：exon 9 deletion	NF2: c.79_80dup	2024.10.22	17.2	2025.10.13	11.9
P20	HJG	M	50	0	None	NA	2b	1	1	Right renal tumor, retroperitoneal lymph nodes, mediastinal lymph nodes	3	Intermediate	NA	FH：c.478A>G	NA	2024.12.10	NA	2025.11.10	11.2
			30								1						10.7		17.75
			50.25								4.25								12.2
											2.5								23.025
