# Supplementary material for: Tislelizumab plus lenvatinib as the first-line therapy in patients with advanced fumarate hydratase-deficient renal cell carcinoma: a single-arm, single-centre, phase 2 trial and metabolic biomarker analysis
Source: Research Square preprint supplement (doi:10.21203/rs.3.rs-8771803/v1), 2026-02-13
Supplement: Supplementary file 3 [file 4f321d28ef365ad96e5ce762.xlsx]

## Sheet: Tumor assessment 2025.12.22
No.	病人姓名	Enrollment date	Last followup	Survival status at the latest followup	Duration of followup, Cutoff:.22/12/2025，Month	Best of response	Latest RECIST assessment	Time to response，week	Duration of response，Month	Progression-free survival，Month	Duration of Treatment，Month	Overall survival，Month	其他需要说明	Baseline	C2后		评估	C4后		评估	C6后		评估	C8后		评估	F1		评估	F2		评估	F3		评估	F4		评估	F5		评估	F6		评估	F7		评估
P01	陈立强	2023.9.5	2024.8.17	Death	11.6	SD	PD			4.4	11.6	11.6	非靶骨转移进展	114	90	-0.211	SD	90	-0.211	SD	25	-0.781	PD	25	-0.781	PD
P02	胡玉泽	2023.9.17	2025.12.22	Survive	27.6	PR	PD	6	26.1	27.6	27.6	27.6 censor	囊性病灶有增大，但不符合recist靶病灶标准，在额外随访中，囊性病灶持续增大，但未见明显实质性成分；后随访实性成分增大，判进展	101	52	-0.4851	PR	45	-0.5545	PR	32	-0.6832	PR	32	-0.6832	PR	39	-0.6238	PR	39	-0.6238	PR	39	-0.6238	PR	37	-0.6238	PR	38	-0.6238	PR	38	-0.6238	PR	48	-0.5248	PD
P03	曹青	2023.11.7	2025.11.17	Survive	24.7	CR	CR	6	23.2 censor	24.7 censor	8.6	24.7 censor	非靶骨转移行放疗，后因irAE（肺炎）持续停药中	30	21	-0.3	PR	12	-0.6	PR	10	-0.6667	PR	10	-0.6667	PR	缺失	缺失	缺失	0	-1	CR	0	-1	CR	0	-1	CR	0	-1	CR	0	-1	CR	0	-1	CR
P04	曹永浩	2023.11.24	2025.11.10	Survive	23.9	PR	PD	6	16.3	17.8	23.9	23.9 censor	在第5次治疗后访视时靶病灶达到PD	259	137	-0.471	PR	108	-0.583	PR	109	-0.583	PR	95	-0.6332	PR	95	-0.6332	PR	73	-0.7181	PR	60	-0.768	PR	75	-0.7104	PD
P05	尤炤	2023.12.15	2025.12.29	Survive	24.8	CR	PD	6	23.3	24.8	24.8	24.8 censor	第1次访视时PR，有非靶，第二次CR；腹膜后复燃，耐药进展	37	0	-1	PR	0	-1	CR	0	-1	CR	0	-1	CR	0	-1	CR	0	-1	CR	0	-1	CR	0	-1	CR	0	-1	CR	17	-0.5405	PD
P06	林凤仪	2024.1.10	2025.12.22	Survive	23.7	CR	CR	6	22.2censor	23.7 censor	23.7	23.7 censor	主动脉弓，后腹膜后肿大淋巴结	43	20	-0.5349	PR	15	-0.6512	PR	7	-0.8372	PR	0	-1	CR	0	-1	CR	0	-1	CR	0	-1	CR	0	-1	CR	0	-1	CR	0	-1	CR
P07	陈明炜	2024.1.24	2025.9.22	Survive	20.2	PR	PR (Surgery followed)	6	5.3 censor	6.8 censor	19.2	20.2censor	24.8.16靶病灶手术	90	55	-0.3889	PR	54	-0.4	PR	54	-0.4	PR	48	-0.4667	PR	53	-0.4111	PR	OT
P08	吕志刚	2024.2.6	2025.10.13	Survive	20.5	PR	PR (Surgery followed)	6	3.3 censor	4.8 censor	19.5	20.5 censor	2024.6.28靶病灶手术	21	11	-0.4762	PR	12	-0.4286	PR	12	-0.4286	PR	OT
P09	陈胜利	2024.2.6	2025.12.22	Survive	22.8	PR	PD (Radiotherapy）	6	19.2	20.7	22.8	22.8 censor	非靶存在，新发左肾上腺转移，SBRT处理左肾上腺	73	27	-0.6301	PR	13	-0.8219	PR	9	-0.8767	PR	8	-0.8904	PR	8	-0.8904	PR	8	-0.8904	PR	10	-0.863	PR	10	-0.863	PR	10, new lesion in left adrenal gland	-0.863	PD
P10	尤玉亮	2024.2.6	2025.10.28	Survive	21	PR	PD (Radiotherapy）	6	7.2	8.7	21	21.0 censor	非靶存在，irAE停免疫, 24.10.24靶病灶增大超20%，同时新发肾上腺转移，判PD；2025.3.12靶病灶放疗	63	23	-0.6349	PR	14	-0.7778	PR	9	-0.8571	PR	8	-0.873	PR	14,new lesion in left adrenal gland	-0.7778	PD
P11	周建岳	2024.4.24	2025.10.13	Survive	17.9	PR	PD	6	10.1	11.6	17.9	17.9 censor	非靶存在，irAE停药，肾上腺，骨转移进展	90	18	-0.8	PR	5	-0.9444	PR	5	-0.9444	PR	5	-0.9444	PR	9	-0.9	PR	12	-0.867	PD
P12	胡双利	2024.4.24	2025.4.28	Survive	12.3	PR	PD	6	4	5.5	12.3	12.3 censor	10.7报告病理性骨折，非靶进展，后不能提供影像学检查结果；4.24后失访	21	14	-0.3333	PR	13	-0.381	PR	11	-0.4762	PR	imaging not provided	Paraplegia Secondary to a Pathological Spinal Fracture	PD
P13	徐杰	2024.5.2	2025.10.13	Survive	17.6	PR	PR	18	13.4 censor	17.6 censor	17.6	17.6 censor	7.14报告非靶有进展风险（小网膜囊）	30	24	-0.2	SD	23	-0.2333	SD	19	-0.3667	PR	15	-0.5	PR	10	-0.667	PR	10	-0.667	PR	10	-0.667	PR	10	-0.667	PR
P14	吕扬	2024.7.10	2025.3.14	Death	8.2	PR	PD	6	4.3	5.8	8.2	8.2	24.12.31靶病灶进展；25.3.14死亡	150	98	-0.3467	PR	91	-0.3933	PR	108	-0.28	SD	114	-0.24	PD
P15	许连青	2024.7.23	2025.10.13	Survive	14.9	CR	CR	6	13.4 censor	14.9 censor	14.9	14.9 censor		17	0	-1	CR	0	-1	CR	0	-1	CR	0	-1	CR	0	-1	CR	0	-1	CR	0	-1	CR
P16	刘佳聪	2024.9.10	2025.11.10	Survive	14.2	PR	PR	12	11.4 censor	14.2 censor	14.2	14.2 censor	靶：肾、肾上腺	210	152	-0.2762	SD	133	-0.3667	PR	81	-0.614	PR	78	-0.629	PR	71	-0.6619	PR	80	-0.619	PR	81	-0.6143	PR
P17	周张存	2024.10.9	2025.12.22	Survive	14.6	PR	PR	12	11.8 censor	14.6 censor	14.6	14.6 censor	靶：肝脏*2 后腹膜 左侧腰大肌旁	133	111	-0.1654	SD	90	-0.3233	PR	84	-0.368	PR	68	-0.489	PR	74	-0.4436	PR	77	-0.4211	PR	70	-0.4737	PR
P18	陈芳	2024.10.22	2025.10.13	Survive	11.9	PR	PR (Radiotherapy followed)	6	4.6 censor	6.1 censor	11.9	11.9 censor	靶：肝脏、后腹膜；25.4.23行靶病灶放疗	67	33	-0.5075	PR	33	-0.5075	PR	27	-0.597	PR	21	-0.687	PR	SBRT
P19	晏学礼	2024.10.22	2025.10.13	Survive	11.9	PR	PR (Radiotherapy followed)	6	4.6 censor	6.1 censor	11.9	11.9 censor	靶：淋巴*2，后腹壁；25.4.25行靶病灶放疗	102	37	-0.6373	PR	25	-0.755	PR	18	-0.824	PR	12	-0.882	PR	SBRT
P20	胡剑刚	2024.12.10	2025.11.10	Survive	11.2	PR	PR (Surgery followed)	18	1.9 censor	6.1 censor	11.2	11.2 censor	靶：肾 后腹膜*2；25.6.12靶病灶手术	105	79	-0.248	SD	74	-0.295	SD	65	-0.381	PR	74	-0.295	PR	OT
					17.75			6			16.25
								6
