# Supplementary material for: Tislelizumab plus lenvatinib as the first-line therapy in patients with advanced fumarate hydratase-deficient renal cell carcinoma: a single-arm, single-centre, phase 2 trial and metabolic biomarker analysis
Source: Research Square preprint supplement (doi:10.21203/rs.3.rs-8771803/v1), 2026-02-13
Supplement: Supplementary file 4 [file 501c3b1105e2fa5df5b84516.docx]

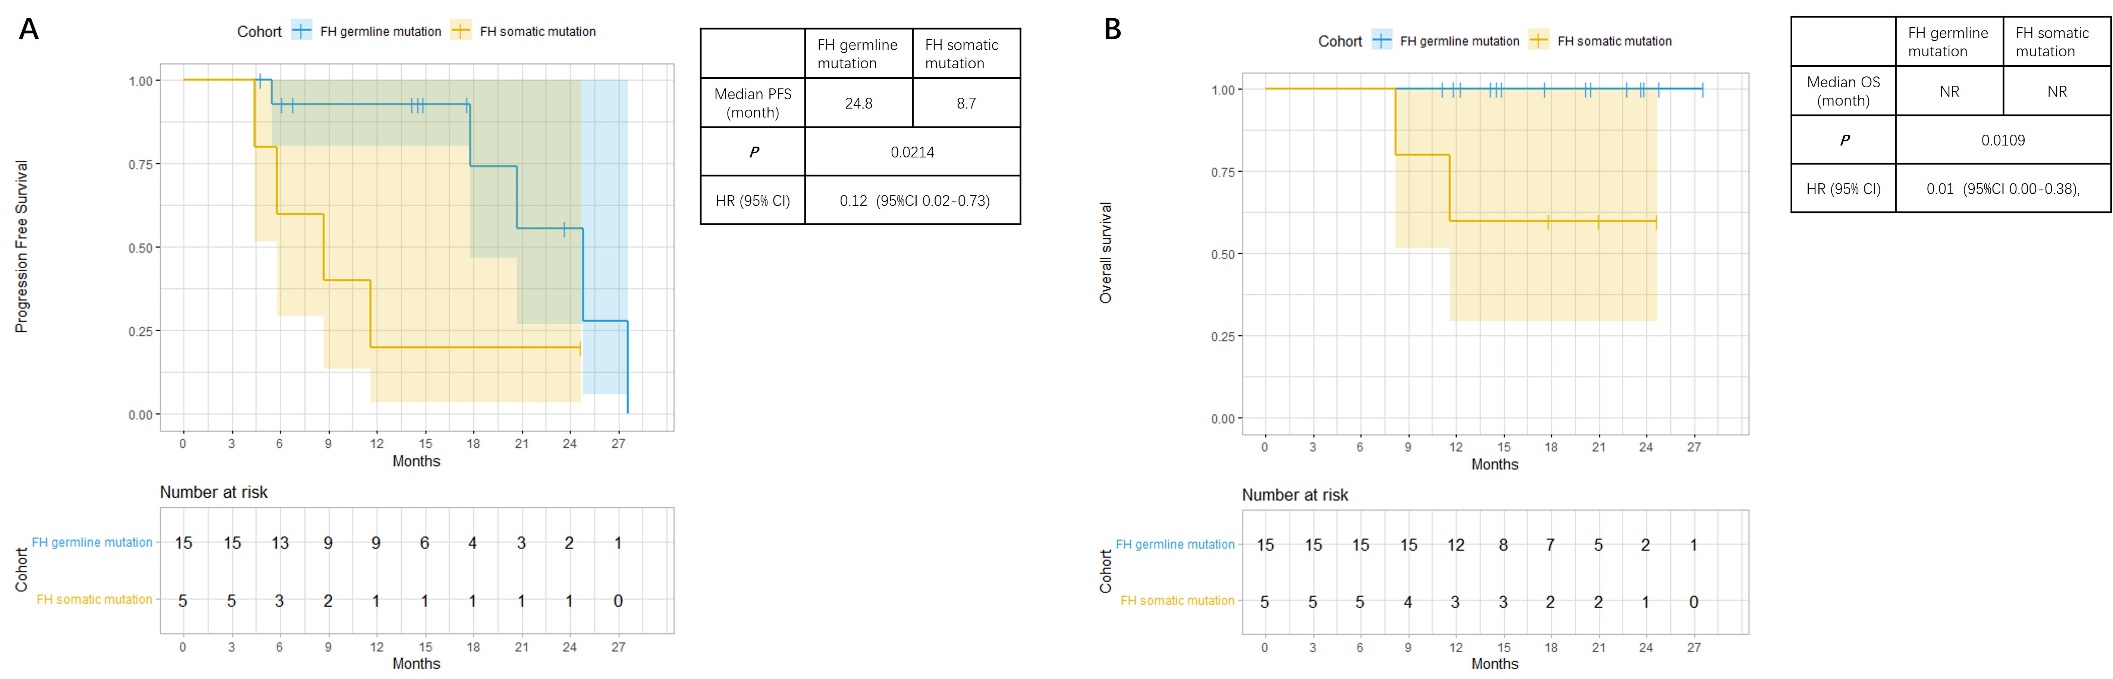


**Figure S1: Comparison of progression-free survival and overall survival between subgroups with different FH status.**

(A) Comparison of PFS between subgroups of patients with *FH* germline mutation and somatic mutation.

(B) Comparison of OS between subgroups of patients with *FH* germline mutation and somatic mutation.
